# Supplementary material
Source: PubMed Central journal article supplement (PMC9194934)
Supplement: pt2c00065_si_001.pdf [file pt2c00065_si_001.pdf]

Supporting Information for:

## **The Remarkable Selectivity of Nirmatrelvir**

Damien Y. Duveau<sup>1</sup> and Craig J. Thomas<sup>1,2\*</sup>

1. Division of Preclinical Innovation, National Center for Advancing Translational Sciences, National Institute of Health, Rockville MD 20850.
2. Lymphoid Malignancies Branch, Center for Cancer Research, National Cancer Institute, National Institutes of Health, Bethesda, MD 20892, USA.

\* craigt@mail.nih.gov

### **Table of Contents**

Table S1: Profile of Nirmatrelvir (PF-07321332) and NCGC00185682 Versus a Panel of 23 Cysteine Proteases.

**Table S1:** Profile of Nirmatrelvir (PF-07321332) and NCGC00185682 Versus a Panel of 23 Cysteine Proteases.

|    |                 | Compound IC50 (M) |                            | Control IC50 (M) | Control ID |
|----|-----------------|-------------------|----------------------------|------------------|------------|
|    |                 | NCGC00185682      | Nirmatrelvir (PF-07321332) |                  |            |
| 1  | Calpain 1       |                   |                            | 3.09E-08         | E64        |
| 2  | Caspase 1       | 7.66E-09          |                            | 1.73E-08         | IETD-CHO   |
| 3  | Caspase 2       |                   |                            | 1.09E-07         | IETD-CHO   |
| 4  | Caspase 3       |                   |                            | 1.03E-09         | DEVD-CHO   |
| 5  | Caspase 4       |                   |                            | 7.84E-07         | IETD-CHO   |
| 6  | Caspase 5       | 3.59E-07          |                            | 6.44E-09         | IETD-CHO   |
| 7  | Caspase 6       |                   |                            | 2.32E-08         | DEVD-CHO   |
| 8  | Caspase 7       |                   |                            | 1.75E-09         | DEVD-CHO   |
| 9  | Caspase 8       | 9.67E-06          |                            | 1.74E-09         | IETD-CHO   |
| 10 | Caspase 9       | 1.01E-06          |                            | 2.17E-08         | IETD-CHO   |
| 11 | Caspase 10      |                   |                            | 1.25E-08         | IETD-CHO   |
| 12 | Caspase 11      |                   |                            | 8.60E-08         | IETD-CHO   |
| 13 | Caspase 14      |                   |                            | 5.66E-08         | WEHD-CHO   |
| 14 | Cathepsin B     |                   |                            | 3.15E-09         | E64        |
| 15 | Cathepsin C     |                   |                            | 7.35E-07         | E64        |
| 16 | Cathepsin H     |                   |                            | 2.50E-08         | E64        |
| 17 | Cathepsin K     | 6.73E-06          | 2.31E-07                   | 4.74E-10         | E64        |
| 18 | Cathepsin L     |                   | **>1.00E-05                | 2.21E-09         | E64        |
| 19 | Cathepsin S     |                   | 3.87E-06                   | 1.74E-09         | E64        |
| 20 | Cathepsin V     |                   | 2.90E-06                   | 5.41E-09         | E64        |
| 21 | Papain          |                   | **>1.00E-05                | 1.50E-10         | E64        |
| 22 | SARS-CoV2-Mpro  |                   | 3.62E-09                   | 1.14E-08         | GC376      |
| 23 | SARS-CoV2-Plpro |                   |                            | 8.99E-07         | Plpro Inh. |

Notes:

- 1) Nirmatrelvir (PF-07321332) and NCGC00185682 were tested in 10-dose IC50 singlet with a 3-fold serial dilution starting at 10  $\mu$ M.
- 2) Control compounds were tested in a 10-dose IC50 with a 3-fold serial dilution starting at 10  $\mu$ M.
- 3) Protease activities were monitored as a time-course measurement of the increase in fluorescence signal from fluorescently-labeled peptide substrate.
- 4) Empty cells indicate no inhibition or compound activity that could not be fit to an IC50 curve.
- 5) \*\* IC50 value higher than 10  $\mu$ M is estimated based on the best curve fitting available.
